# Supplementary material for: Development of a functional salivary gland tissue chip with potential for high-content drug screening
Source: PubMed Central journal article supplement (PMC7979686; doi:10.1038/s42003-021-01876-x), 2021-03-19
Supplement: 42003_2021_1876_MOESM2_ESM.pdf [file 42003_2021_1876_MOESM2_ESM.pdf]

## **Supplemental Figures**

**Supplementary Figure 1:** Isolation and viability of AIDUC for mouse salivary gland tissue chip.

**Supplementary Figure 2:** AIDUC characterization by IHC staining with acinar and duct cell-specific markers.

**Supplementary Figure 3:** Microbubble (MB) array fabrication steps.

**Supplementary Figure 4:** Mouse AIDUCs seeded in MB-hydrogels lack detectable expression of the neuronal marker,  $\beta$ III-tubulin (*Tubb3*).

**Supplementary Figure 5:** Characterization of SGm by IHC staining with acinar and duct cell-specific markers.

**Supplementary Figure 6:** SGm cultured in MB-hydrogel promotes formation of tight junctions and apicobasal polarization.

**Supplementary Figure 7:** Characterization of SGm using Periodic acid-Schiff's – Alcian Blue (PAS-AB) staining.

**Supplementary Figure 8:** Cytokeratin-positive cell outgrowth from MB is observed after day 7 in SGm.

**Supplementary Figure 9:** SGm in MB-hydrogels express the  $\beta$ -adrenergic receptor and are responsive to stimulation with isoproterenol (IPN).

**Supplementary Figure 10:** Human SGm raw fluorescence intensity to enable normalized amylase measurements.

**Supplementary Figure 11:** Timeline of SGm irradiation, radioprotection, and characterization.

**Supplementary Table 1:** Mouse and human primers for qPCR.

**Supplementary Table 2:** Antibody Information for IHC.

## **Supplementary Videos**

**Supplementary Video 1:** Timelapse of formation of SGm in MB-hydrogel over 4 days.

**Supplementary Video 2:** Representative calcium imaging of mouse SGm at Day 7 stimulated with CCh.

**Supplementary Video 3:** Representative of whole-chip calcium imaging on mouse SGm at Day 7 stimulated with CCh.

**Supplementary Video 4:** Representative calcium imaging of human SGm at Day 7 stimulated with CCh.

**Supplementary Video 5:** Representative whole-chip calcium imaging on human SGm at Day 7 stimulated with CCh.

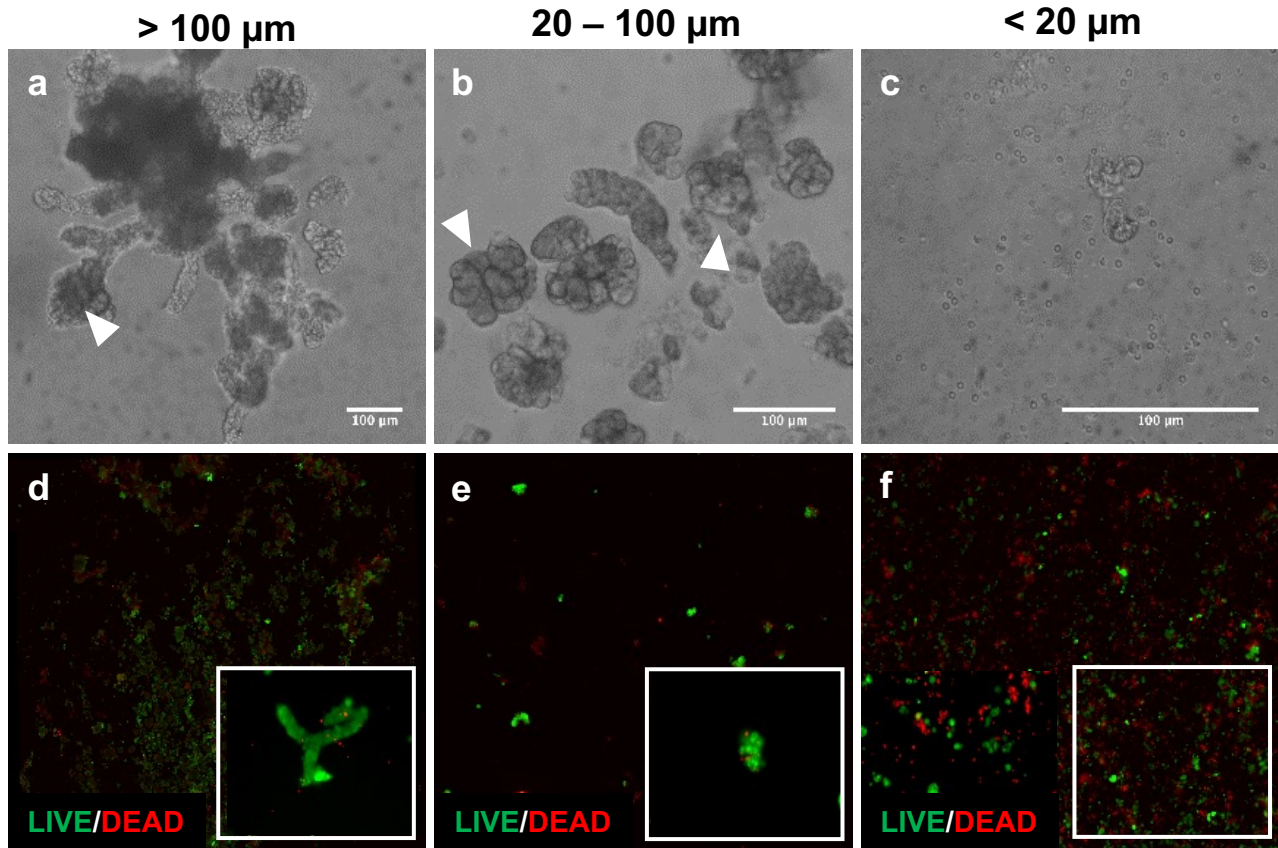

**Supplementary Figure 1: Isolation and viability of AIDUC for salivary gland tissue chip.** **a-c**, Representative brightfield and **d-f**, fluorescent LIVE/DEAD stained images of mouse submandibular gland digest fractions of **a & d**, >100  $\mu\text{m}$ , **b & e**, 20 – 100  $\mu\text{m}$ , and **c & f**, <20  $\mu\text{m}$  in size. Scale bars = 100  $\mu\text{m}$ .

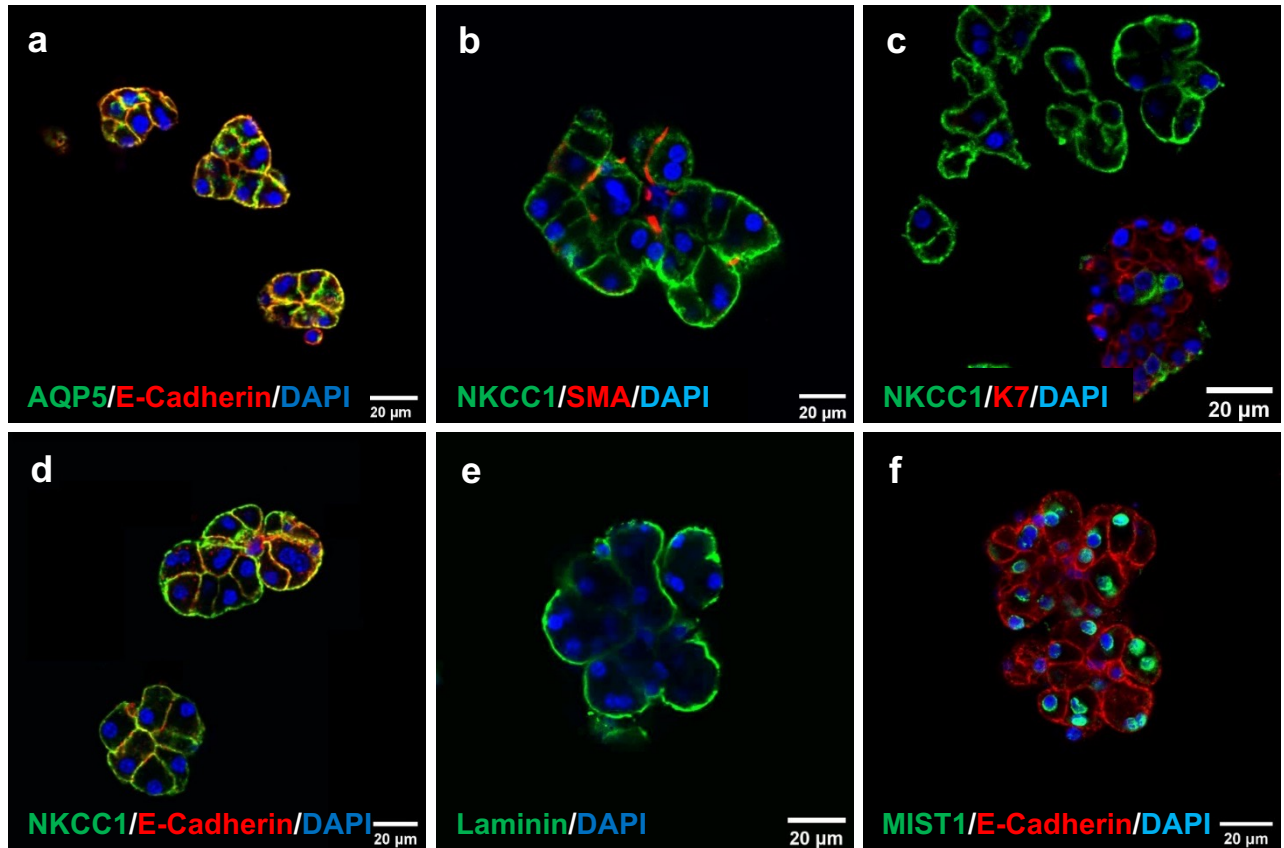

**Supplementary Figure 2: AIDUC characterization using IHC staining with acinar and duct cell-specific markers.** Representative immunofluorescent images of freshly isolated AIDUCs stained with acinar cell markers, AQP5 (**a**, green), NKCC1 (**b**, **c**, **d**, green) and MIST1 (**f**, green), duct cell marker, K7 (**c**, red), myoepithelial cell marker, SMA (**b**, red), epithelial cell marker, E-Cadherin (**a**, **d**, **f**, red) and basement membrane protein, laminin (**e**, green). Nuclei are stained with DAPI (**a** – **f**, blue). Scale bars = 20 µm.

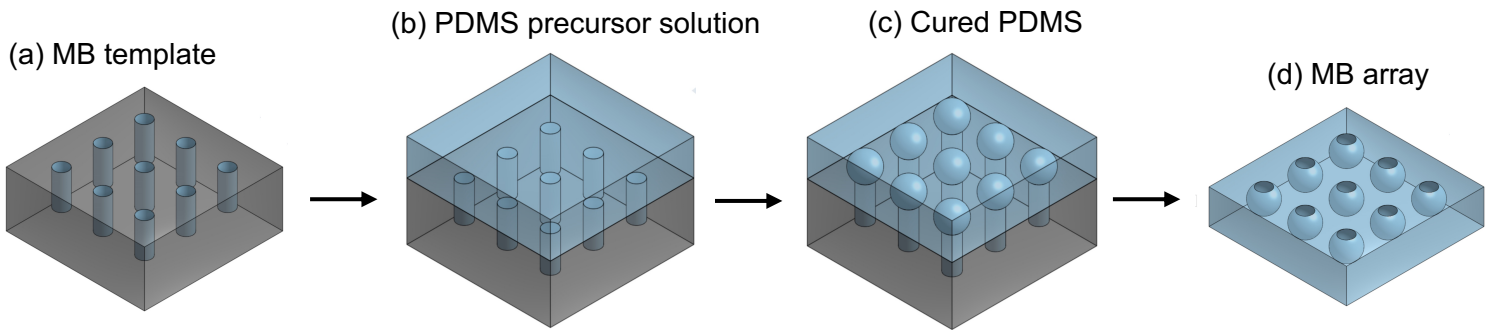

**Supplemental Figure 3: Microbubble (MB) array fabrication steps.** (a) A template (gray) with deep pits is used for MB fabrication using gas expansion molding<sup>41,42</sup>. (b) PDMS precursor solution (blue) is poured over the template. (c) The PDMS solution is cured at 100°C for 2 hours. Air from the pits in the template nucleate microbubble formation in the PDMS. (d) The cured MB array is peeled off the template, flipped over, and glued into the bottom of well plates. Note: not drawn to scale. 3D rendering was done using Onshape. MB parts are commercially available at Nidus MB Technologies ([www.nidusmbt.com](http://www.nidusmbt.com)).

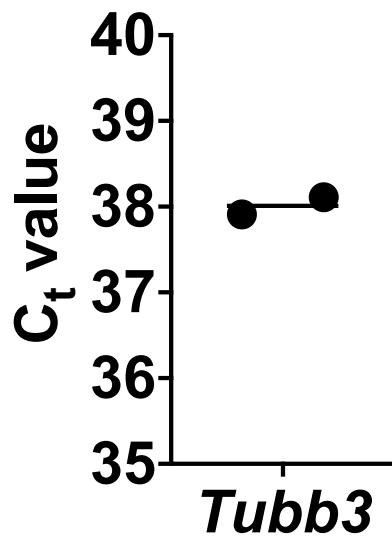

**Supplementary Figure 4: Mouse AIDUCs at day 0 lack detectable expression of the neuronal marker,  $\beta$ III-tubulin (*Tubb3*).** Data are mean  $\pm$  standard deviation from N=6 mice, n=6 samples/mouse where each marker is an average Ct value. Note: 4/6 AIDUCs isolated exhibited undetectable *Tubb3* gene expression, hence only 2 data points are included herein.

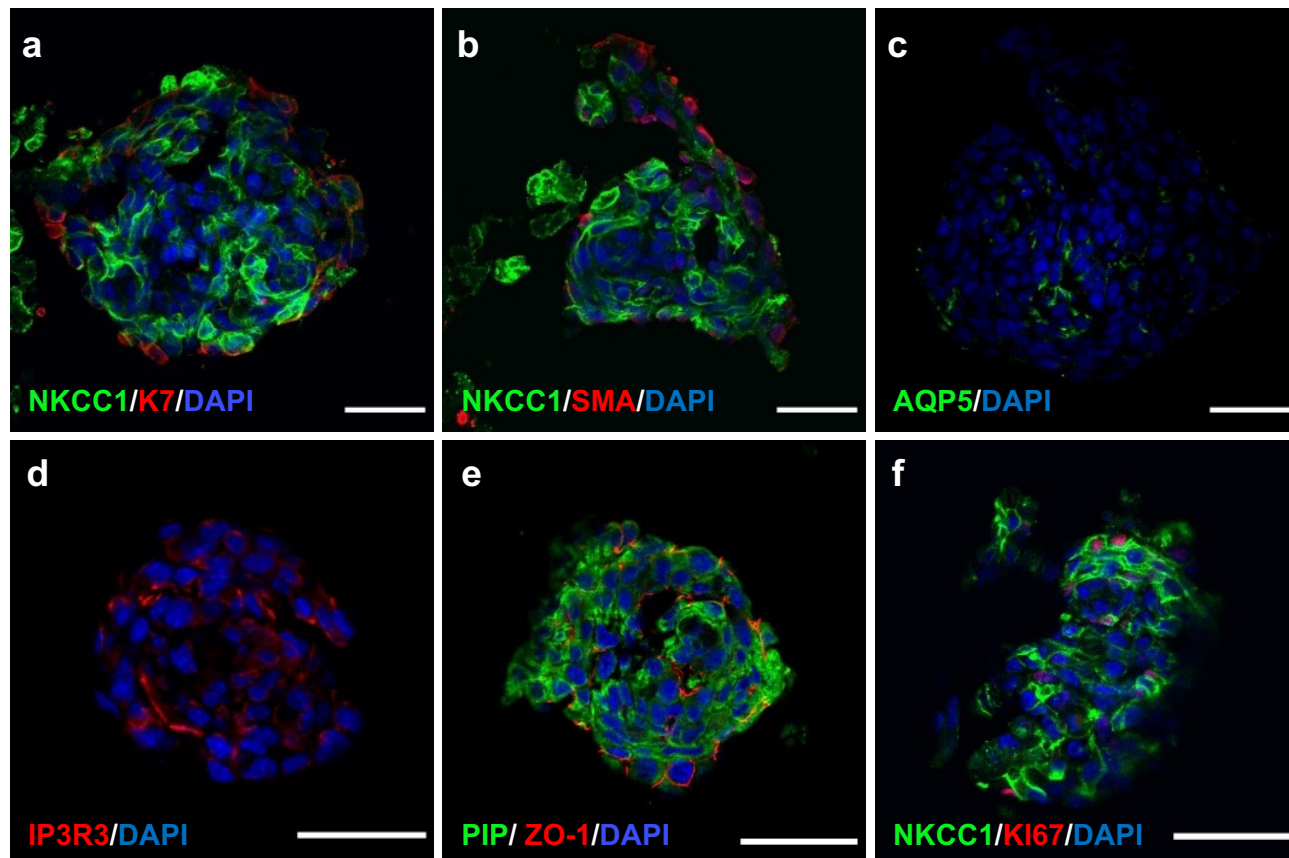

**Supplementary Figure 5: Characterization of SGm using IHC staining with acinar and duct cell-specific markers.** Representative immunofluorescent images of day 7 SGm stained for acinar cell markers, NKCC1 (**a**, **b**, **f**, green), AQP5 (**c**, green), and IP3R3 (**d**, red), duct cell marker, K7 (**a**, red), myoepithelial cell marker, SMA (**b**, red), tight junction protein, ZO-1 (**e**, red), and proliferation marker, Ki67 (**f**, red). Nuclei are stained with DAPI (**a** – **f**, blue). Scale bars = 40  $\mu$ m.

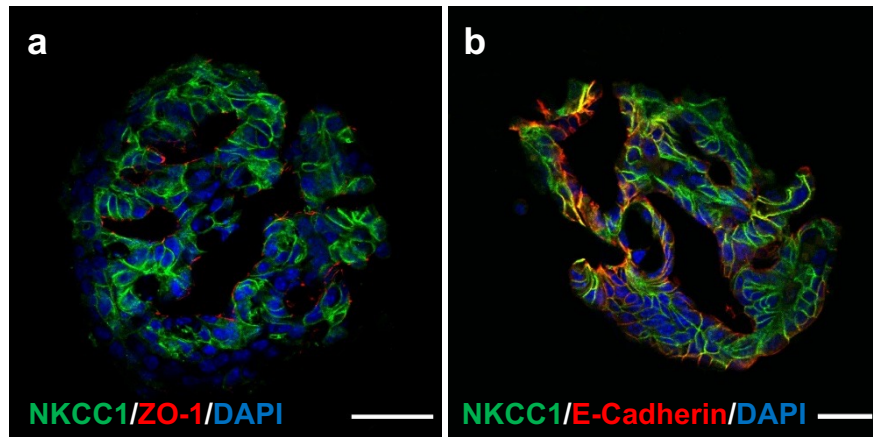

**Supplementary Figure 6: SGm cultured in MB-hydrogel promotes formation of tight junctions and apicobasal polarization.** Representative images of IHC staining of SGm at day 14 of culture. Shown are the acinar cell marker, NKCC1 (**a**, **b**, green), tight junction protein, ZO-1 (**a**, red), and the epithelial cell marker, E-Cadherin (**b**, red). Nuclei are stained with DAPI (**a**, **b** blue). Scale bars = 40  $\mu$ m.

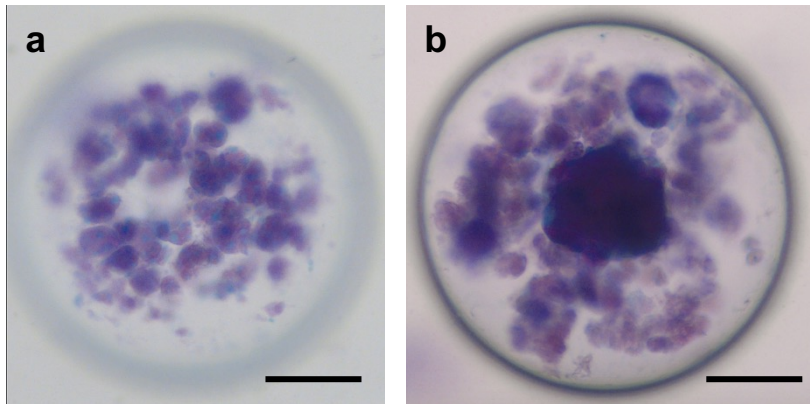

**Supplementary Figure 7: Characterization of SGm using Periodic acid-Schiff's – Alcian Blue (PAS-AB) staining.** Staining of day 0 (a) and day 7 (b) SGm in the MB chip showing presence of both acidic and neutral mucins. Scale bar = 100  $\mu$ m.



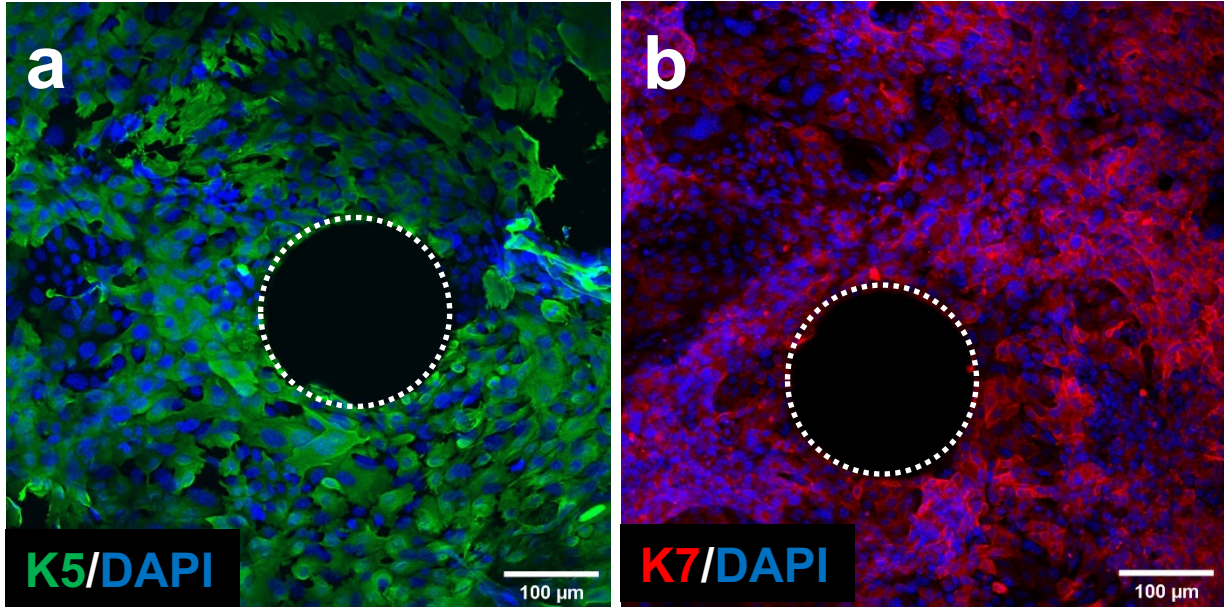

**Supplementary Figure 8: Cytokeratin-positive cell outgrowth from MB is observed after day 7 in SGm.** Representative immunofluorescent images of day 14 SGm culture focused on MB array chip surface stained for cytokeratin 5 (K5) (a, green) and cytokeratin 7 (K7) (b, red). Nuclei are stained with DAPI (blue). White circles indicate the opening of the MBs.

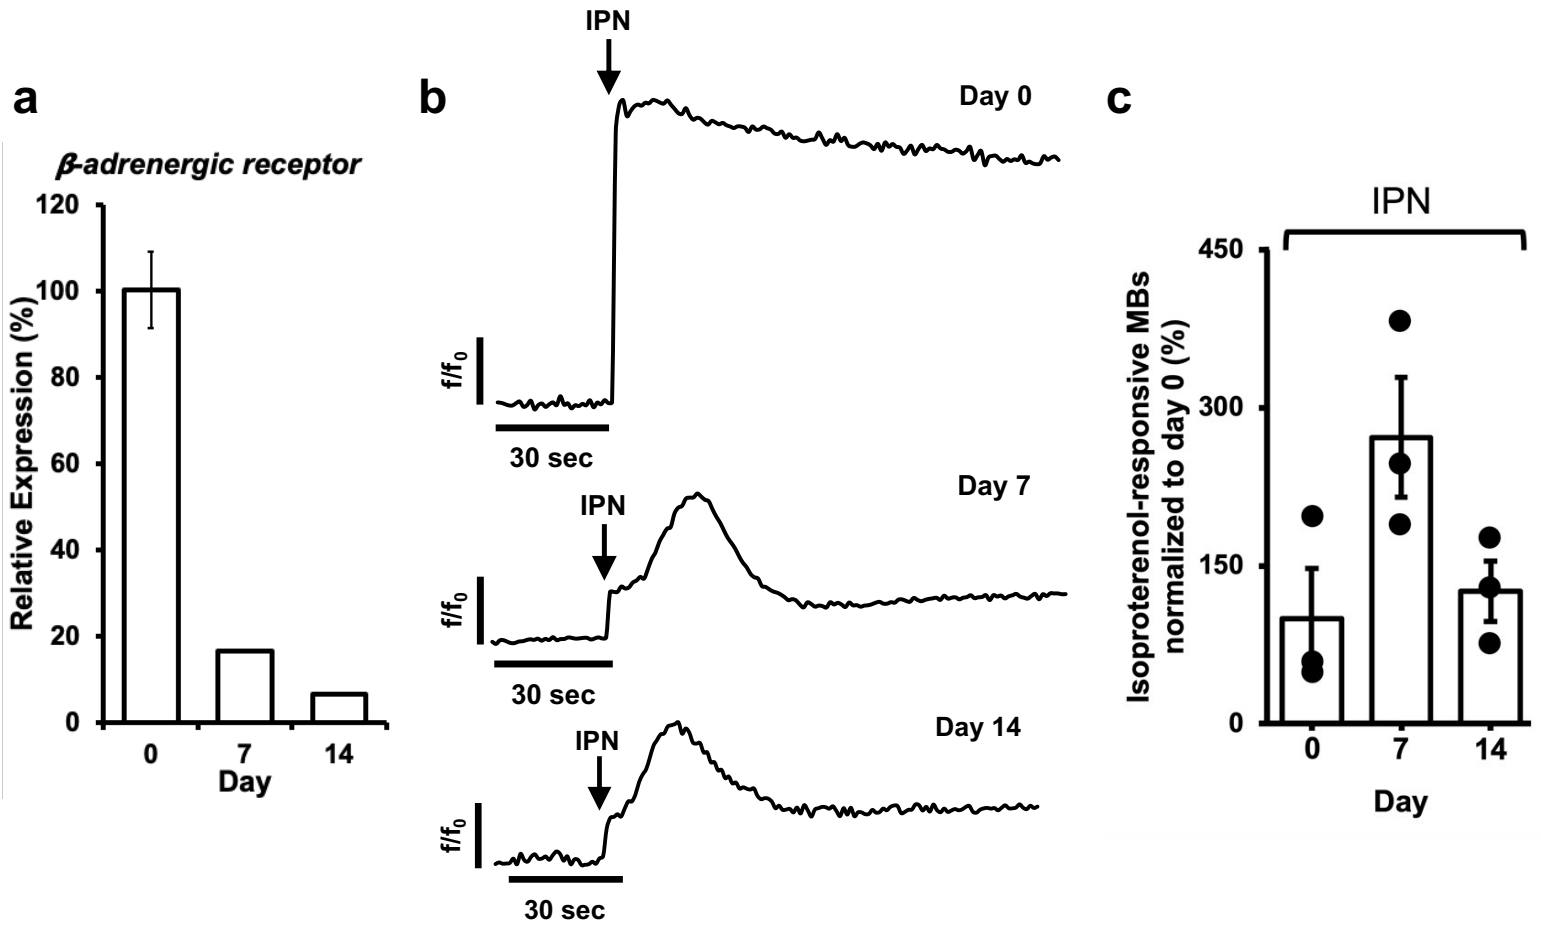

**Supplementary Figure 9: Mouse SGM in MB-hydrogels express the  $\beta$ -adrenergic receptor (ADRA2 receptor) and are responsive to stimulation with adrenergic agonist isoproterenol (IPN).** **a**, Gene expression of the  $\beta$ -adrenergic receptor. **b**, Representative fluorescent traces of responsive SGM at day 0, 7, and 14 upon IPN stimulation. Data are represented as fluorescent intensity ( $f$ ) divided by fluorescent at time 0 ( $f_0$ ). **c**, Percent of SGM in MBs responsive to IPN. Response is characterized by a significant difference between baseline timepoints and agonist timepoints via unpaired t-tests corrected for multiple comparisons using Holm-Sidak with  $\alpha = 0.05$ . Data is graphed and normalized to day 0 as 100%. Gene expression data are mean  $\pm$  standard deviation from  $N=1$ ,  $n=3$  per timepoint. Fluorescent calcium flux data are mean  $\pm$  SEM,  $N = 3$ ,  $n = 112 - 272$  per timepoint.

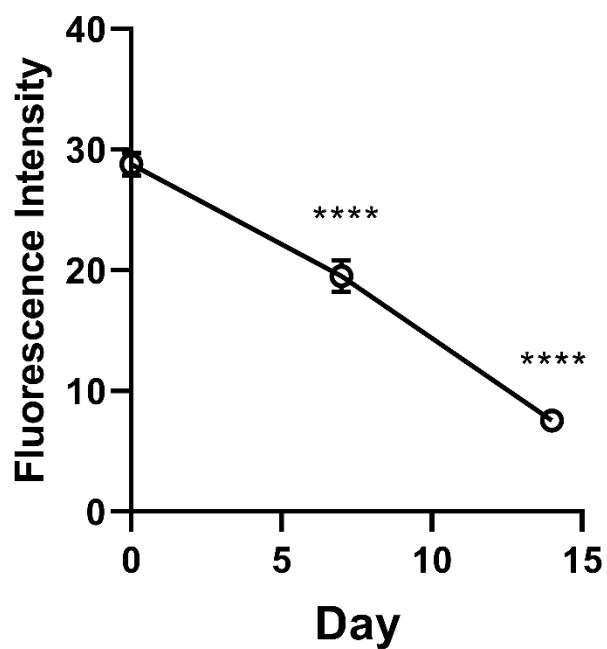

**Supplementary Figure 10: Human SGm raw fluorescence intensity to enable normalized amylase measurements.** Quantification of fluorescence intensity generated by amylase activity in the MB-hydrogel at days 0, 7, and 14, represented as the mean and standard deviation of the fluorescence intensity from individual MBs. \*\*\*\*p < 0.0001

**Supplementary Figure 11: Timeline of SGM irradiation, radioprotection, and characterization.** Timeline depicting seeding, WR1065 dosing and irradiation schedule, and timepoints for analyses used in singular and fractionated irradiation experiments.

**Singular dose irradiation:**

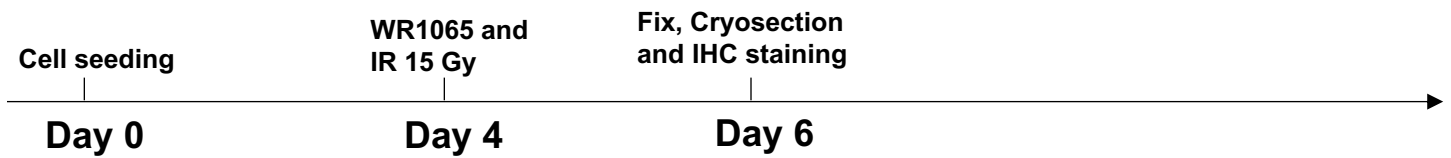

**Fractionated irradiation:**

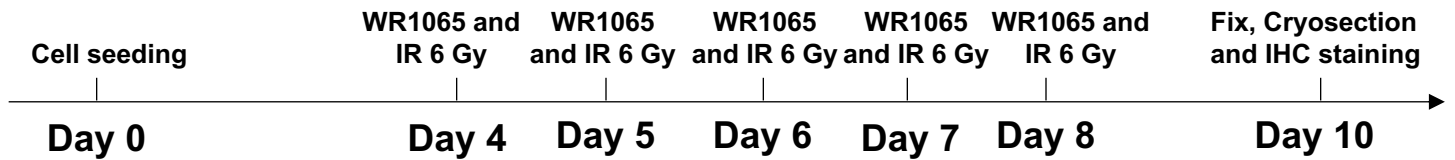

**Supplementary Table 1: Mouse and human primers for PCR**

| <b>Mouse</b>                                   | <b>Sequence</b>           | <b>Ref.</b>                                                      |
|------------------------------------------------|---------------------------|------------------------------------------------------------------|
| <i>Rps29</i>                                   | F AATACGGGCTGAACATGTGC    | PrimerBLAST design with MIQE validation                          |
|                                                | R AGCATGATCGGTTCCACTTG    |                                                                  |
| <i>Mist1</i>                                   | F GCTGACCGCCACCATACTTAC   | Shubin et al. Acta Biomaterialia 2017                            |
|                                                | R TGTGTAGAGTAGCGTTGCAGG   |                                                                  |
| <i>Pip</i>                                     | F GGGTCTCTCATTACATTCAGTG  | Shubin et al. Acta Biomaterialia 2017                            |
|                                                | R TGATCTCCTGATTTTCCTGTGCT |                                                                  |
| <i>Nkcc1</i>                                   | F TTCCGCGTGAACCTTCGTGG    | Shubin et al. Acta Biomaterialia 2017                            |
|                                                | R TTGGTGTGGGTGTCATAGTAGT  |                                                                  |
| <i>Aqp5</i>                                    | F GTGAGTGGTGGCCACATCAATCC | Shubin et al. Acta Biomaterialia 2017                            |
|                                                | R GGGAGTCCGTGGAGGAGAAGAT  |                                                                  |
| <i>M3r</i>                                     | F GGGGAACCTAGCCTGTGACC    | PrimerBLAST design with MIQE validation                          |
|                                                | R GTTGTTTCGTTTGGCTCGG     |                                                                  |
| <i>P2y2</i>                                    | F CGCTTCAACGAGGACTTCA     | PrimerBLAST design with MIQE validation                          |
|                                                | R GGTTTTGAGGCGGCATAGGA    |                                                                  |
| <i>P2x7</i>                                    | F GCTGCTTGGGAAAAGTCTG     | PrimerBLAST design with MIQE validation                          |
|                                                | R TTTCCACACTGGCACC AAC    |                                                                  |
| <i>Krt5</i>                                    | F TCCTGTTGAACGCCGCTGAC    | Emmerson et al. eLIFE 2017                                       |
|                                                | R CGGAAGGACACACTGGACTGG   |                                                                  |
| <i>Krt7</i>                                    | F CAGGCAGAGATTGACACCTT    | Yamaguchi et al. Development 2006                                |
|                                                | R GCGCCAGCTTGGTGTT CAG    |                                                                  |
| <i><math>\alpha</math>-Sma</i>                 | F GTCCCAGACATCAGGGAGTAA   | Wu et al. J Immunol 2014                                         |
|                                                | R TCGGATACTTCAGCGTCAGGA   |                                                                  |
| <i>Amy1</i>                                    | F ACTGGGCTTTGT CAGAACT    | Yamagishi et al. Acta Histchem Cytochem 2014                     |
|                                                | R GGGTCTTCGGCAGAGTTACT    |                                                                  |
| <i>Cst3</i>                                    | F AGGAGGCAGATGCCAATGAG    | Spandidos et al. Nucl Acids Res 2010<br>PrimerBank ID 31981822a1 |
|                                                | R GGGCTGGTCATGGAAAGGA     |                                                                  |
| <i>Cst10</i>                                   | F CTGGCTGTGATCCCTGAAGC    | Spandidos et al. Nucl Acids Res 2010<br>PrimerBank ID 10946758a1 |
|                                                | R ACTTTCTGCACCTCCTTATCCT  |                                                                  |
| <i>Lyz2</i>                                    | F ATGGAATGGCTGGCTACTATGG  | Spandidos et al. Nucl Acids Res 2010<br>PrimerBank ID 8393739a1  |
|                                                | R ACCAGTATCGGCTATTGATCTGA |                                                                  |
| <i>Muc5b</i>                                   | F GCACGTAAATGCGACTGTCT    | Tetaert et al. Respiratory Research 2007                         |
|                                                | R ATGGACCTTGCTCTCCTGAC    |                                                                  |
| <i>Ngf</i>                                     | F CCAGTGAAATTAGGCTCCCTG   | Spandidos et al. Nucl Acids Res 2010<br>PrimerBank ID 7305313a1  |
|                                                | R CCTTGGCCAAAACCTTTATTGGG |                                                                  |
| <i>Smr3a</i>                                   | F GGCCCTAGAAGACATGATCCT   | Spandidos et al. Nucl Acids Res 2010<br>PrimerBank ID 14389425a1 |
|                                                | R GGAGACGGATTGCTTGGAGG    |                                                                  |
| <i><math>\beta</math>1-adrenergic receptor</i> | F GGAGCTCCCTCGGACGAC      | Mu et al. Nature Med 2012                                        |
|                                                | R AGCCTGGCTCTCTACACCTTG   |                                                                  |
| <i><math>\beta</math>III-tubulin</i>           | F GGCAACTATGTAGGGGACTCAG  | Pasquarella et al. Development 2016                              |
|                                                | R ATGGTTCCAGGTTCCAAGTC    |                                                                  |

  

| <b>Human</b> | <b>Sequence</b>          | <b>Ref.</b>                             |
|--------------|--------------------------|-----------------------------------------|
| <i>RPS29</i> | F GCACTGCTGAGAGCAAGATG   | de Jonge et al. PLOS ONE 2007           |
|              | R ATAGGCAGTGCCAAGGAAGA   |                                         |
| <i>MIST1</i> | F CGGATGCACAAGCTAAATAACG | Emmerson et al. eLIFE 2017              |
|              | R GCCGTCAGCGATTTGATGTAG  |                                         |
| <i>NKCC1</i> | F TTCCGCGTGAACCTTCGTGG   | Farmer et al. Development 2017          |
|              | R TTGGTGTGGGTGTCATAGTAG  |                                         |
| <i>AQP5</i>  | F CTGTCCATTGGCCTGTCTGTC  | Farmer et al. Development 2017          |
|              | R GGCTCATACGTGCCTTTGATC  |                                         |
| <i>M3R</i>   | F TCACAGCACCATCCTCAAC    | PrimerBLAST design with MIQE validation |
|              | R GCTTGTCGGCTTTTCTCTC    |                                         |
| <i>P2Y2</i>  | F ACCCTCAACGCCATCAAC     | PrimerBLAST design with MIQE validation |
|              | R GCCCAGCCAGGAAGTAGAG    |                                         |
| <i>P2X7</i>  | F GACGCTCTGTTCTCTGACC    | Zhang et al. Adv Med Sci 2019           |
|              | R CACCAGGCAGAGACTTCACA   |                                         |

**Supplementary Table 2: Antibody Information for IHC**

| <b>Antigen</b>                                                                         | <b>Company</b>                     | <b>Cat.#</b> | <b>Species</b> |
|----------------------------------------------------------------------------------------|------------------------------------|--------------|----------------|
| Ki67                                                                                   | BD pharmingen                      | 550609       | Mouse          |
| AQP5                                                                                   | Abcam                              | ab92320      | Rabbit         |
| IP3R3                                                                                  | BD Transduction Laboratories™      | 610312       | Mouse          |
| NKCC1(D208R)                                                                           | Cell Signaling                     | 85403        | Rabbit         |
| K7                                                                                     | Abcam                              | ab9021       | Mouse          |
| SMA                                                                                    | Thermo Scientific™                 | MS-113-p     | Mouse          |
| PIP                                                                                    | Generous gift from Dr. Yvonne Myal |              | Rabbit         |
| Amylase                                                                                | Cell Signaling                     | 3796         | Rabbit         |
| 53BP1                                                                                  | Abcam                              | ab175933     | Rabbit         |
| γH2AX                                                                                  | Millipore                          | 05-636-I     | Mouse          |
| ZO-1                                                                                   | Thermo Scientific™                 | 339100       | Mouse          |
| E-Cadherin                                                                             | BD Transduction Laboratories™      | 610181       | Mouse          |
| Laminin                                                                                | Thermo Scientific™                 | PA1-16730    | Rabbit         |
| Mist 1                                                                                 | Abcam                              | ab187978     | Rabbit         |
| Donkey anti-Rabbit IgG (H+L) Highly Cross-Adsorbed Secondary Antibody, Alexa Fluor 488 | Thermo Scientific™                 | A21206       | Donkey         |
| Donkey anti-Mouse IgG (H+L) Highly Cross-Adsorbed Secondary Antibody, Alexa Fluor 594  | Thermo Scientific™                 | A21203       | Donkey         |
