# Supplementary material for: Development of a functional salivary gland tissue chip with potential for high-content drug screening
Source: PubMed Central journal article supplement (PMC7979686; doi:10.1038/s42003-021-01876-x), 2021-03-19
Supplement: 42003_2021_1876_MOESM3_ESM.pdf [file 42003_2021_1876_MOESM3_ESM.pdf]

## Description of Additional Supplementary Files

**File Name:** Supplementary Movie 1

**Description:** Timelapse of formation of SGm in MB-hydrogel over 4 days.

**File Name:** Supplementary Movie 2

**Description:** Representative calcium imaging of mouse SGm at Day 7 stimulated with CCh.

**File Name:** Supplementary Movie 3

**Description:** Representative of whole-chip calcium imaging on mouse SGm at Day 7 stimulated with CCh.

**File Name:** Supplementary Movie 4

**Description:** Representative calcium imaging of human SGm at Day 7 stimulated with CCh.

**File Name:** Supplementary Movie 5

**Description:** Representative whole-chip calcium imaging on human SGm at Day 7 stimulated with CCh.

**File name:** Supplementary Data 1

**Description:** Source data for the main and supplementary figures.
